# Supplementary material
Source: Springer Nature journal article supplement (https://www.springermedizin.de/resource/supplementary/13075_2010_3035_MOESM8_ESM.pdf/9693626)

**normal**

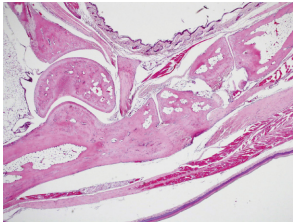

**control IgG**

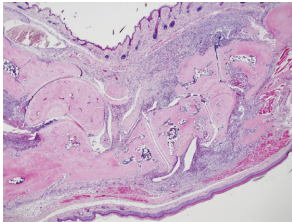

**RMT2-14**

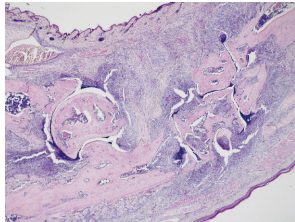

Supplement: MOESM8 [file 9693626]
